# Supplementary material for: Interfacing Langmuir–Blodgett and Pickering Emulsions for the Synthesis of 2D Nanostructured Films: Applications in Copper Ion Adsorption
Source: MDPI journal article supplement (doi:10.3390/nano14090809), 2024-05-06
Supplement: s1 [file s1]

## Supporting Information

### Interfacing Langmuir-Blodgett and Pickering Emulsions for the Synthesis of 2D Nanostructured Films: Applications in Copper Ion Adsorption

Andrei Honciuc\*, Oana-Iuliana Negru, Mirela Honciuc

*“Petru Poni” Institute of Macromolecular Chemistry, 41A Gr. Ghica Voda Alley, Iasi,  
700487, Romania*

\* Correspondence: [honciuc.andrei@icmpp.ro](mailto:honciuc.andrei@icmpp.ro)

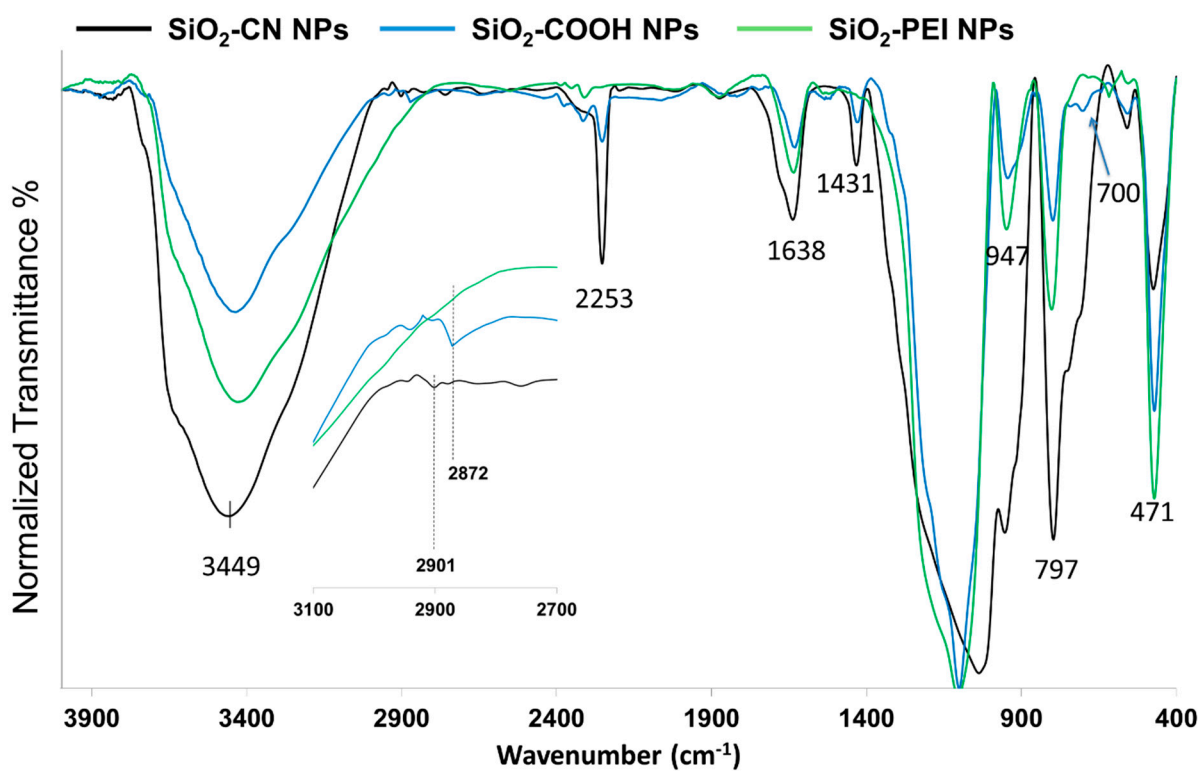

**Figure S1.** Normalized intensity FTIR spectra of the SiO<sub>2</sub>-CN NPs, SiO<sub>2</sub>-COOH NPs and of the SiO<sub>2</sub>-PEI NPs.

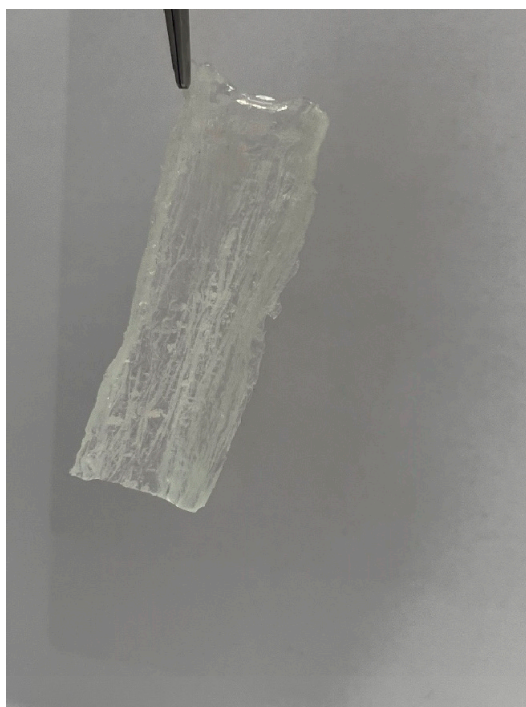

**Figure S2.** Image of the PVA/P(t-BA)/SiO<sub>2</sub>-PEI NPs films taken after performing the Cu(II) adsorption and desorption experiments, showing that it is sturdy and flexible and can be easily manipulated.
